# Supplementary material for: Conjunctive Analyses of BSA-Seq and BSR-Seq to Identify Candidate Genes Controlling the Black Lemma and Pericarp Trait in Barley
Source: MDPI journal article supplement (doi:10.3390/ijms24119473), 2023-05-30
Supplement: s1 [file s1]

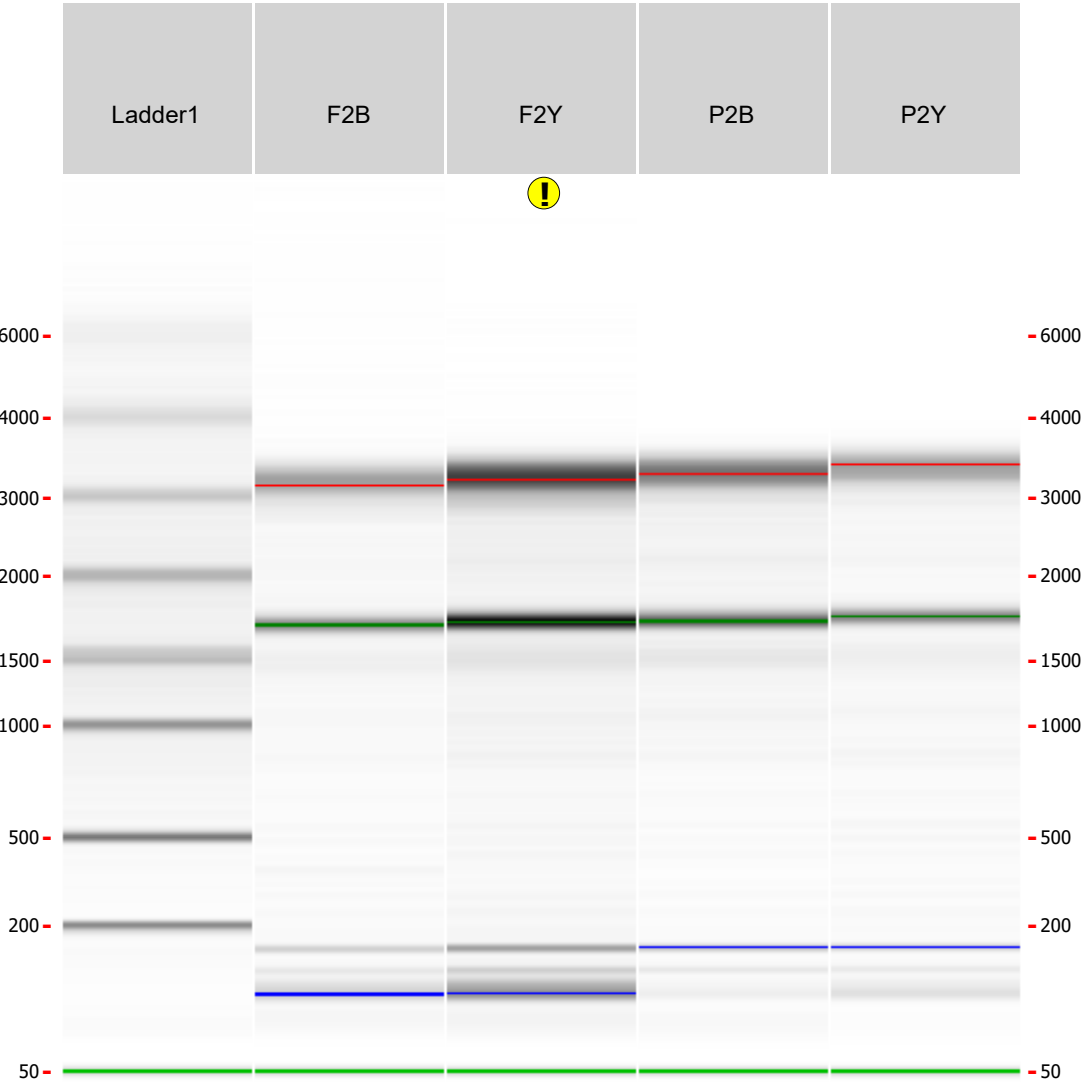

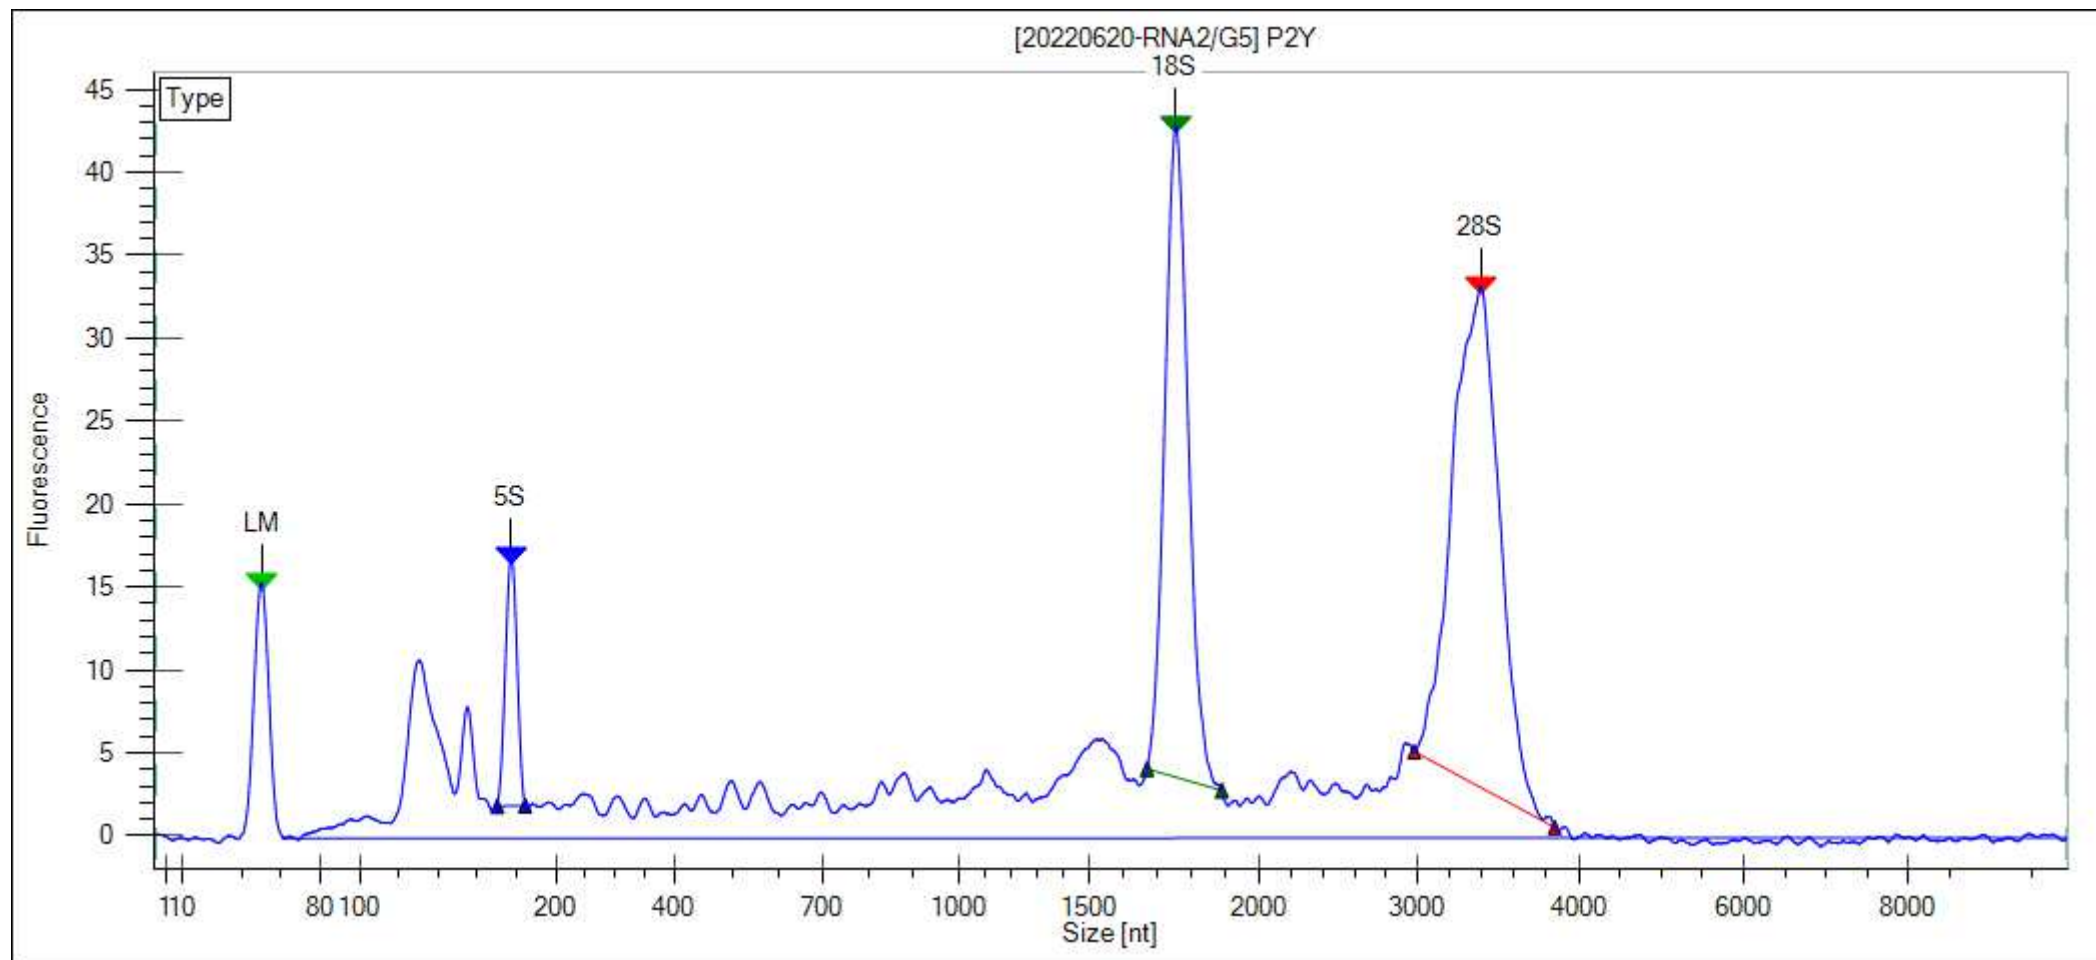

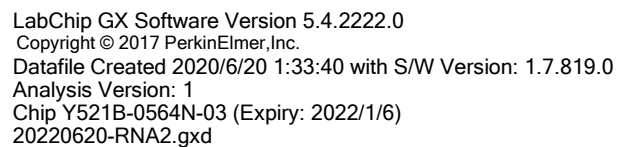

Modified: 2022/6/20 14:28:48 by DESKTOP-76N0R9H\ldell  
Printed: 2023/5/8 11:14:09  
Firmware Version: 1.02.0.37277L\_45  
Instrument: WINDOWS-H0697IN (S/N GT1810N0855)  
Operator: qhzhang

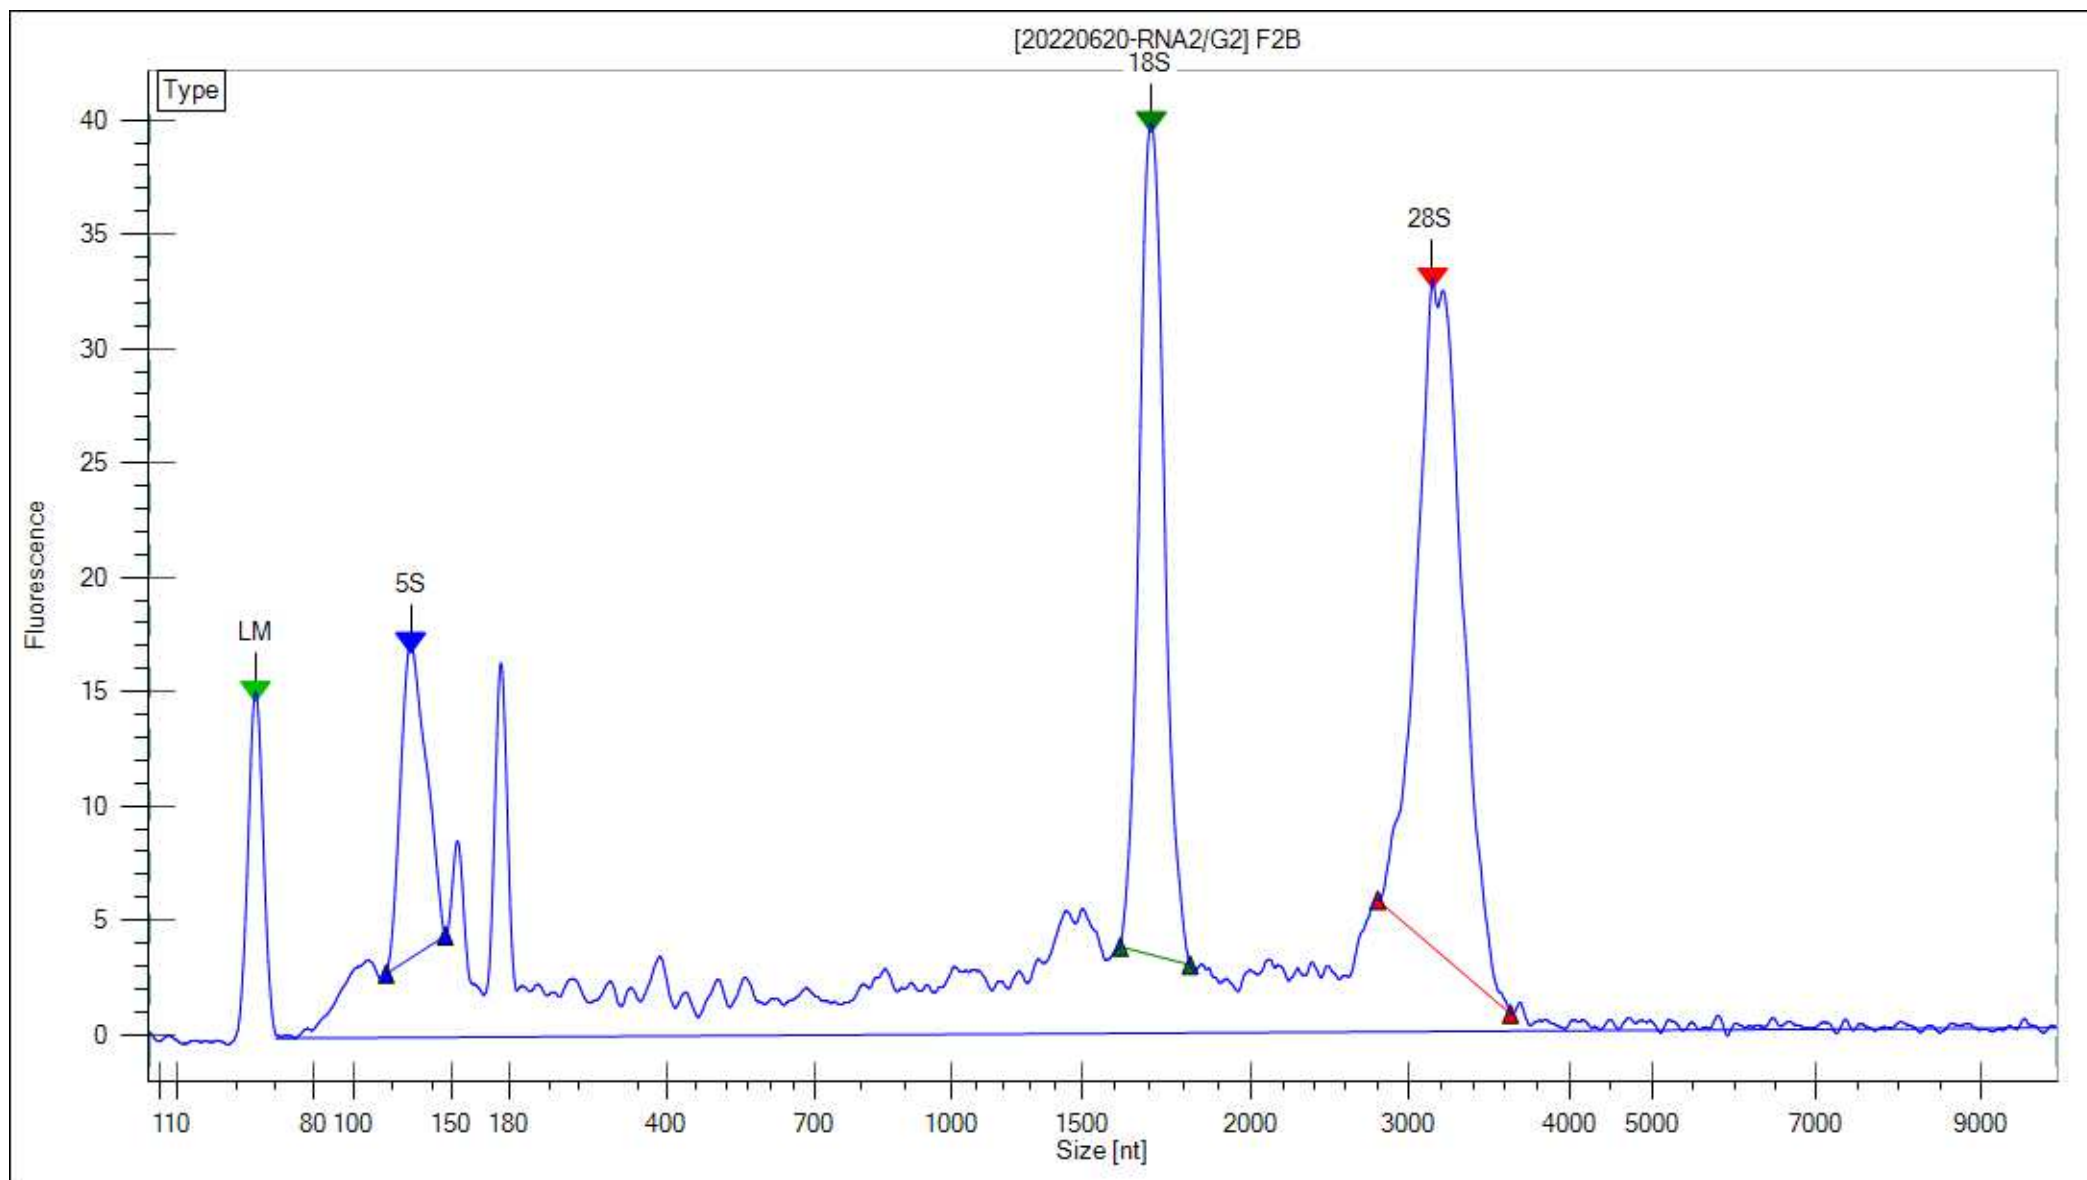

LabChip GX Software Version 5.4.2222.0

Copyright © 2017 PerkinElmer, Inc.

Datafile Created 2020/6/20 1:33:40 with S/W Version: 1.7.819.0

Analysis Version: 1

Chip Y521B-0564N-03 (Expiry: 2022/1/6)

20220620-RNA2.gxd

Modified: 2022/6/20 14:28:48 by DESKTOP-76N0R9H\deli

Printed: 2023/5/8 11:14:09

Firmware Version: 1.02.0.37277L\_45

Instrument: WINDOWS-H0697IN (S/N GT1810N0855)

Operator: qhzhang

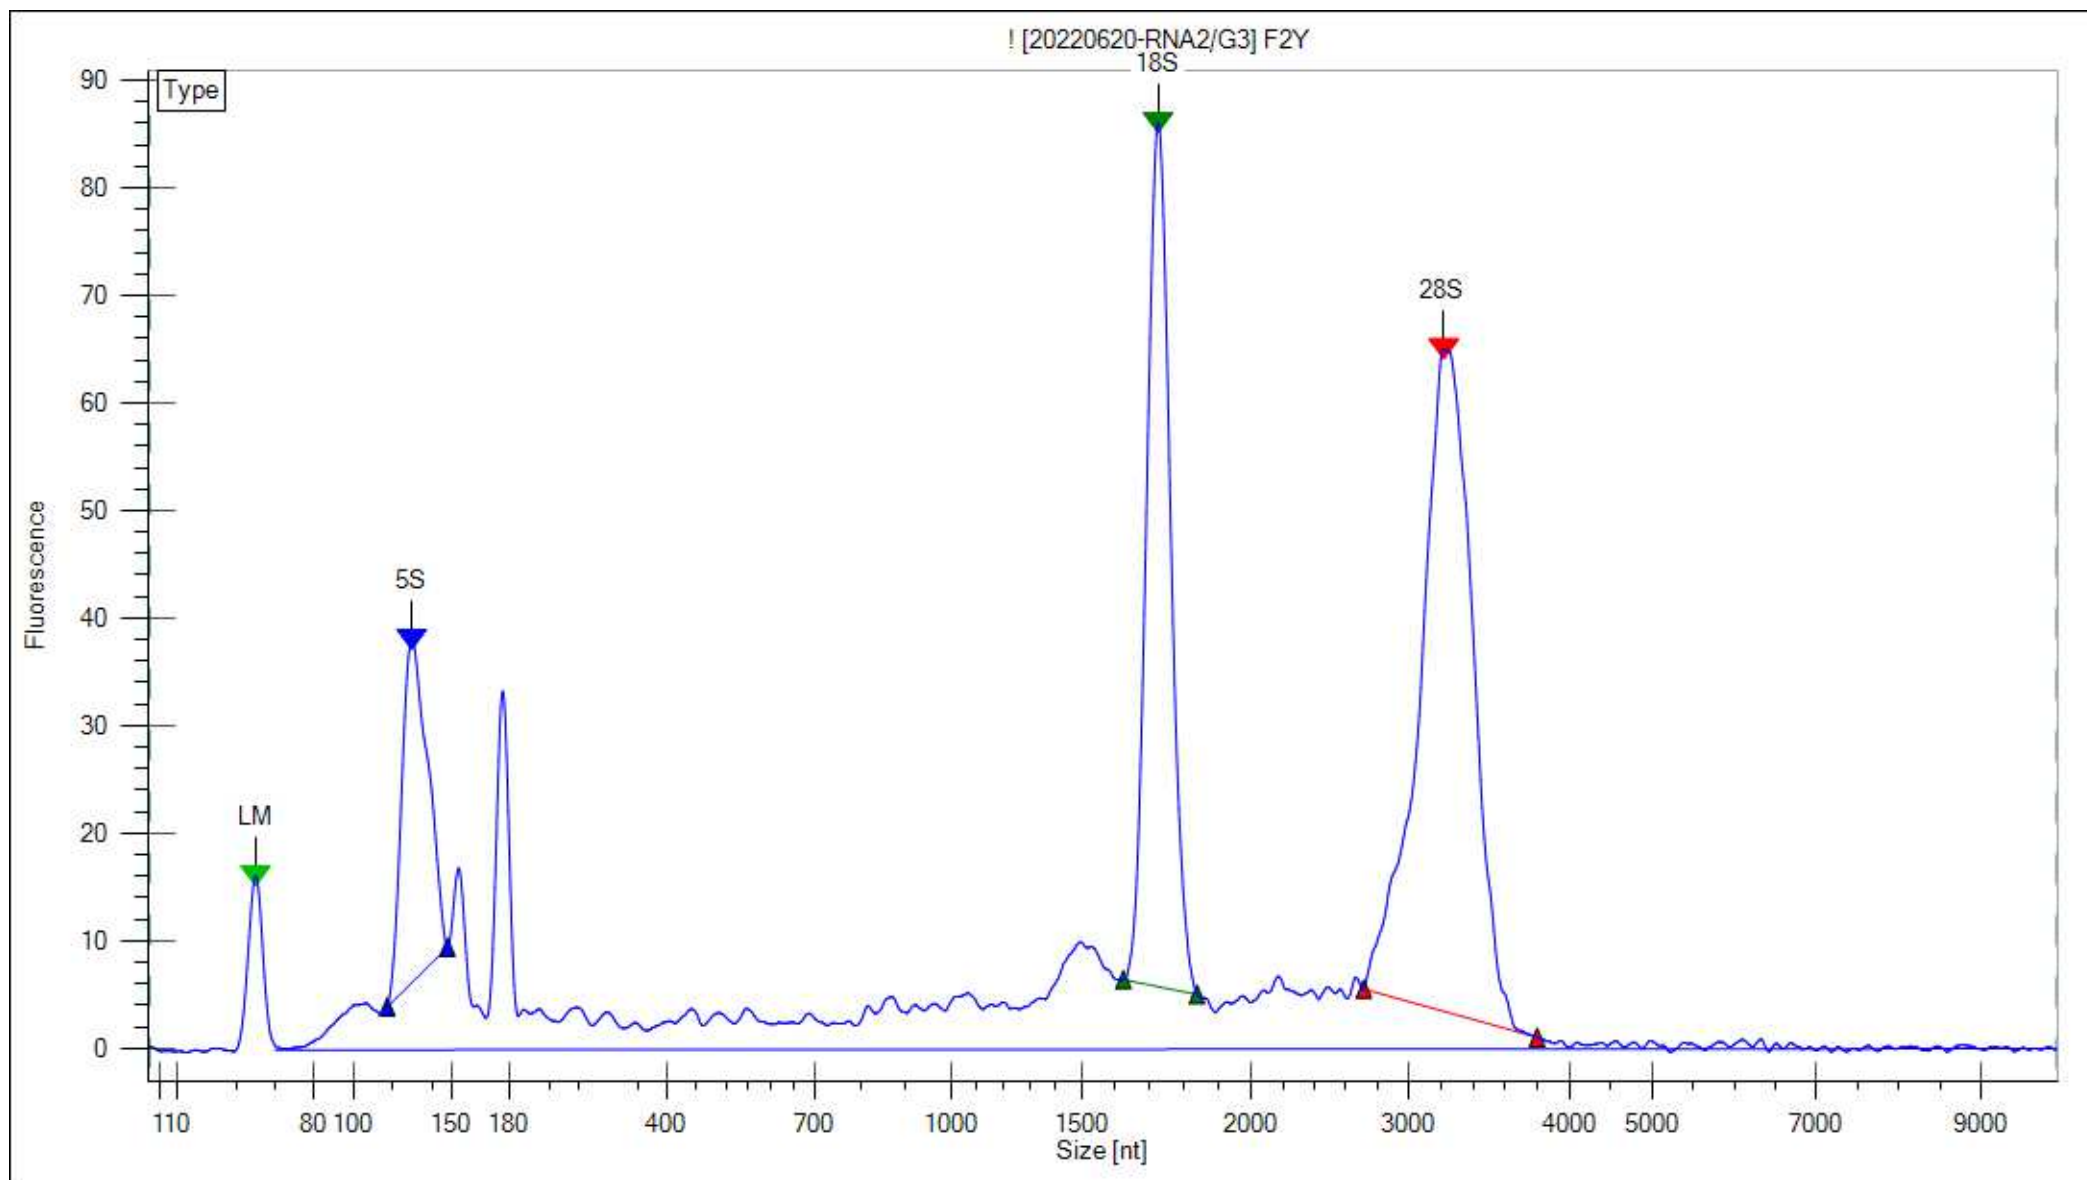

LabChip GX Software Version 5.4.2222.0

Copyright © 2017 PerkinElmer, Inc.

Datafile Created 2020/6/20 1:33:40 with S/W Version: 1.7.819.0

Analysis Version: 1

Chip Y521B-0564N-03 (Expiry: 2022/1/6)

20220620-RNA2.gxd

Modified: 2022/6/20 14:28:48 by DESKTOP-76N0R9H\deli

Printed: 2023/5/8 11:14:09

Firmware Version: 1.02.0.37277L\_45

Instrument: WINDOWS-H0697IN (S/N GT1810N0855)

Operator: qhzhang

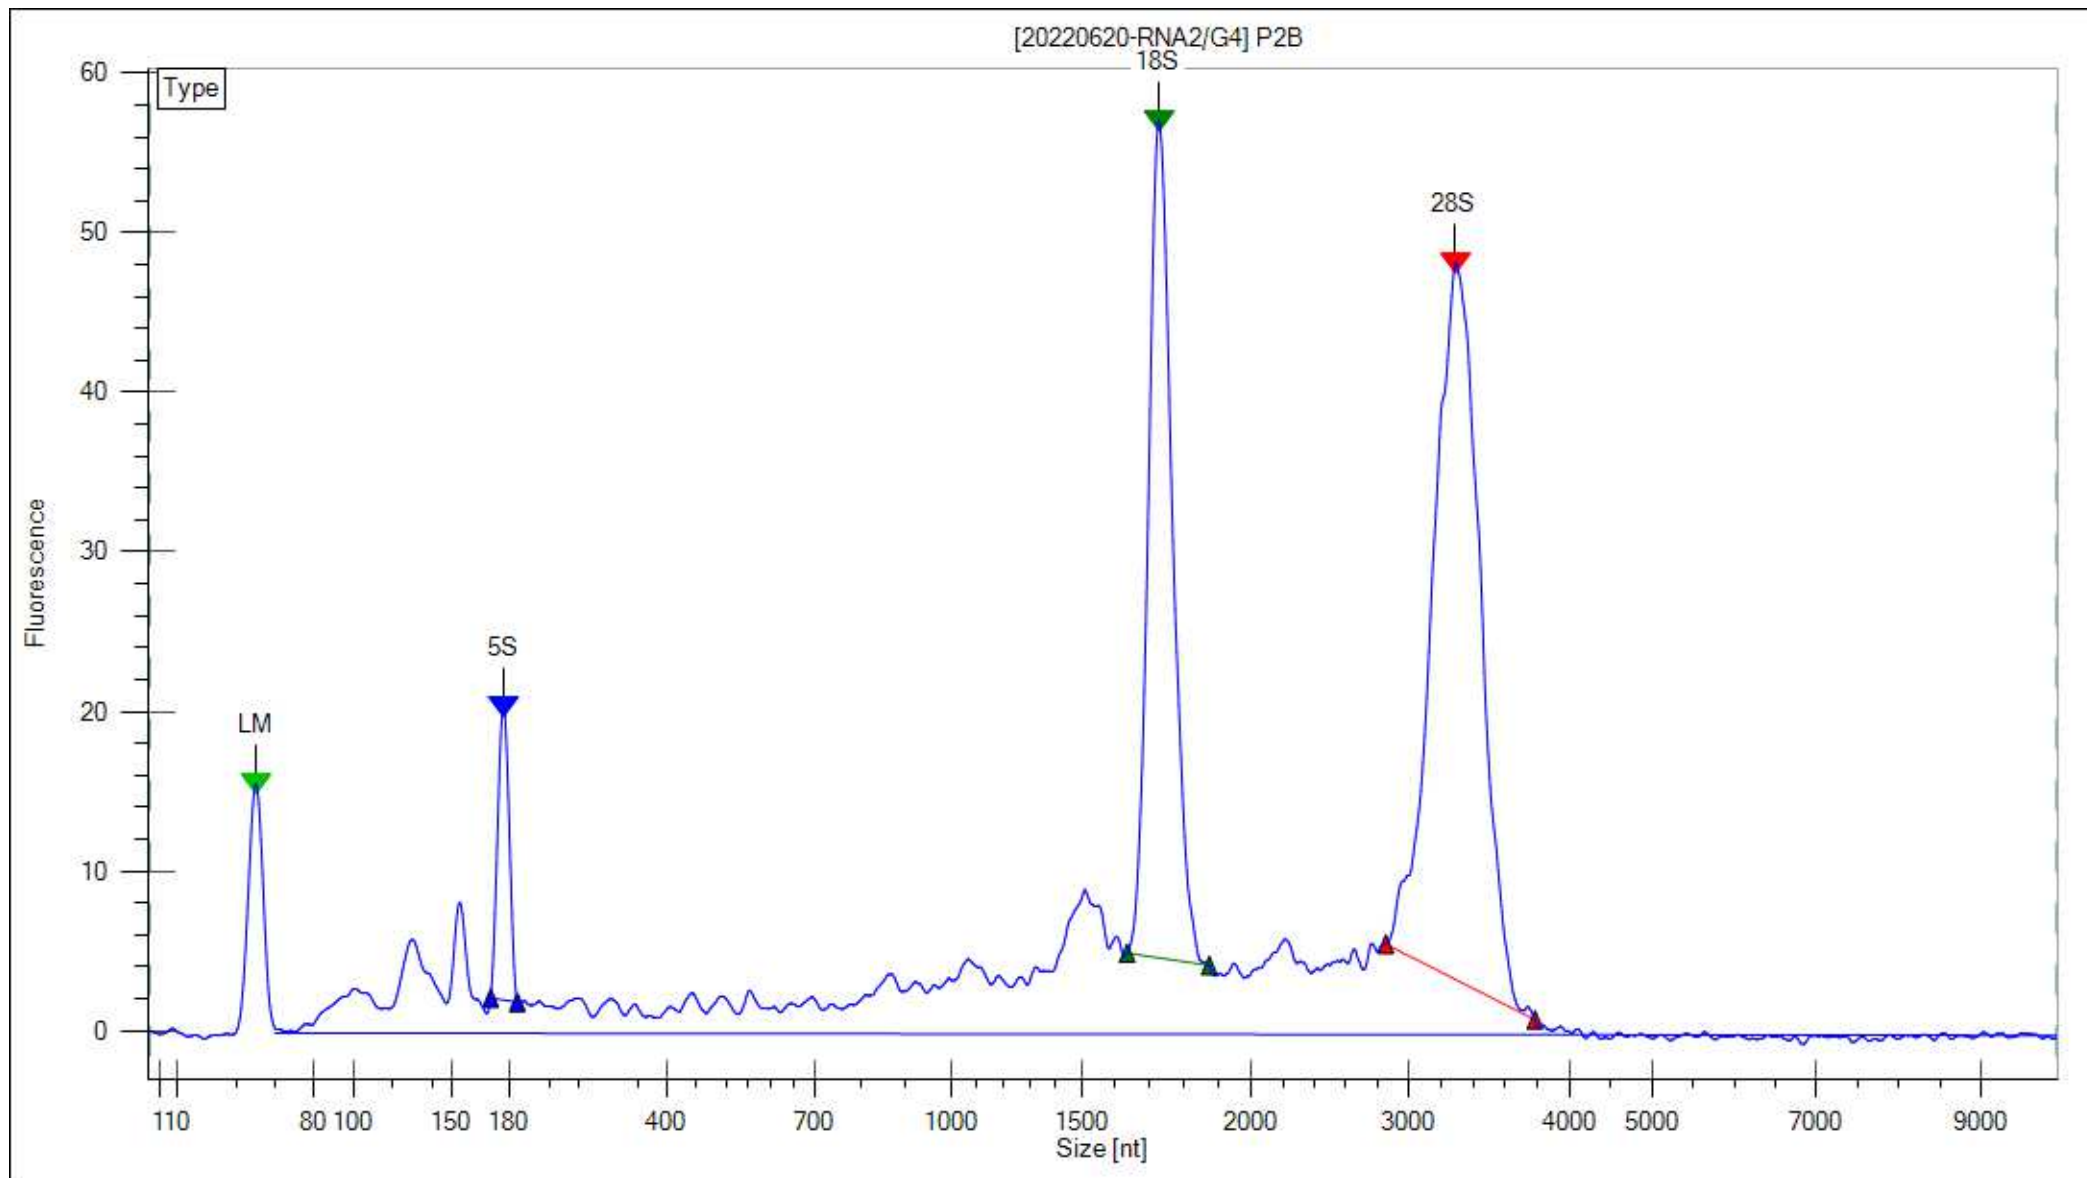

LabChip GX Software Version 5.4.2222.0

Copyright © 2017 PerkinElmer, Inc.

Datafile Created 2020/6/20 1:33:40 with S/W Version: 1.7.819.0

Analysis Version: 1

Chip Y521B-0564N-03 (Expiry: 2022/1/6)

20220620-RNA2.gxd

Modified: 2022/6/20 14:28:48 by DESKTOP-76N0R9H\deli

Printed: 2023/5/8 11:14:10

Firmware Version: 1.02.0.37277L\_45

Instrument: WINDOWS-H0697IN (S/N GT1810N0855)

Operator: qhzhang

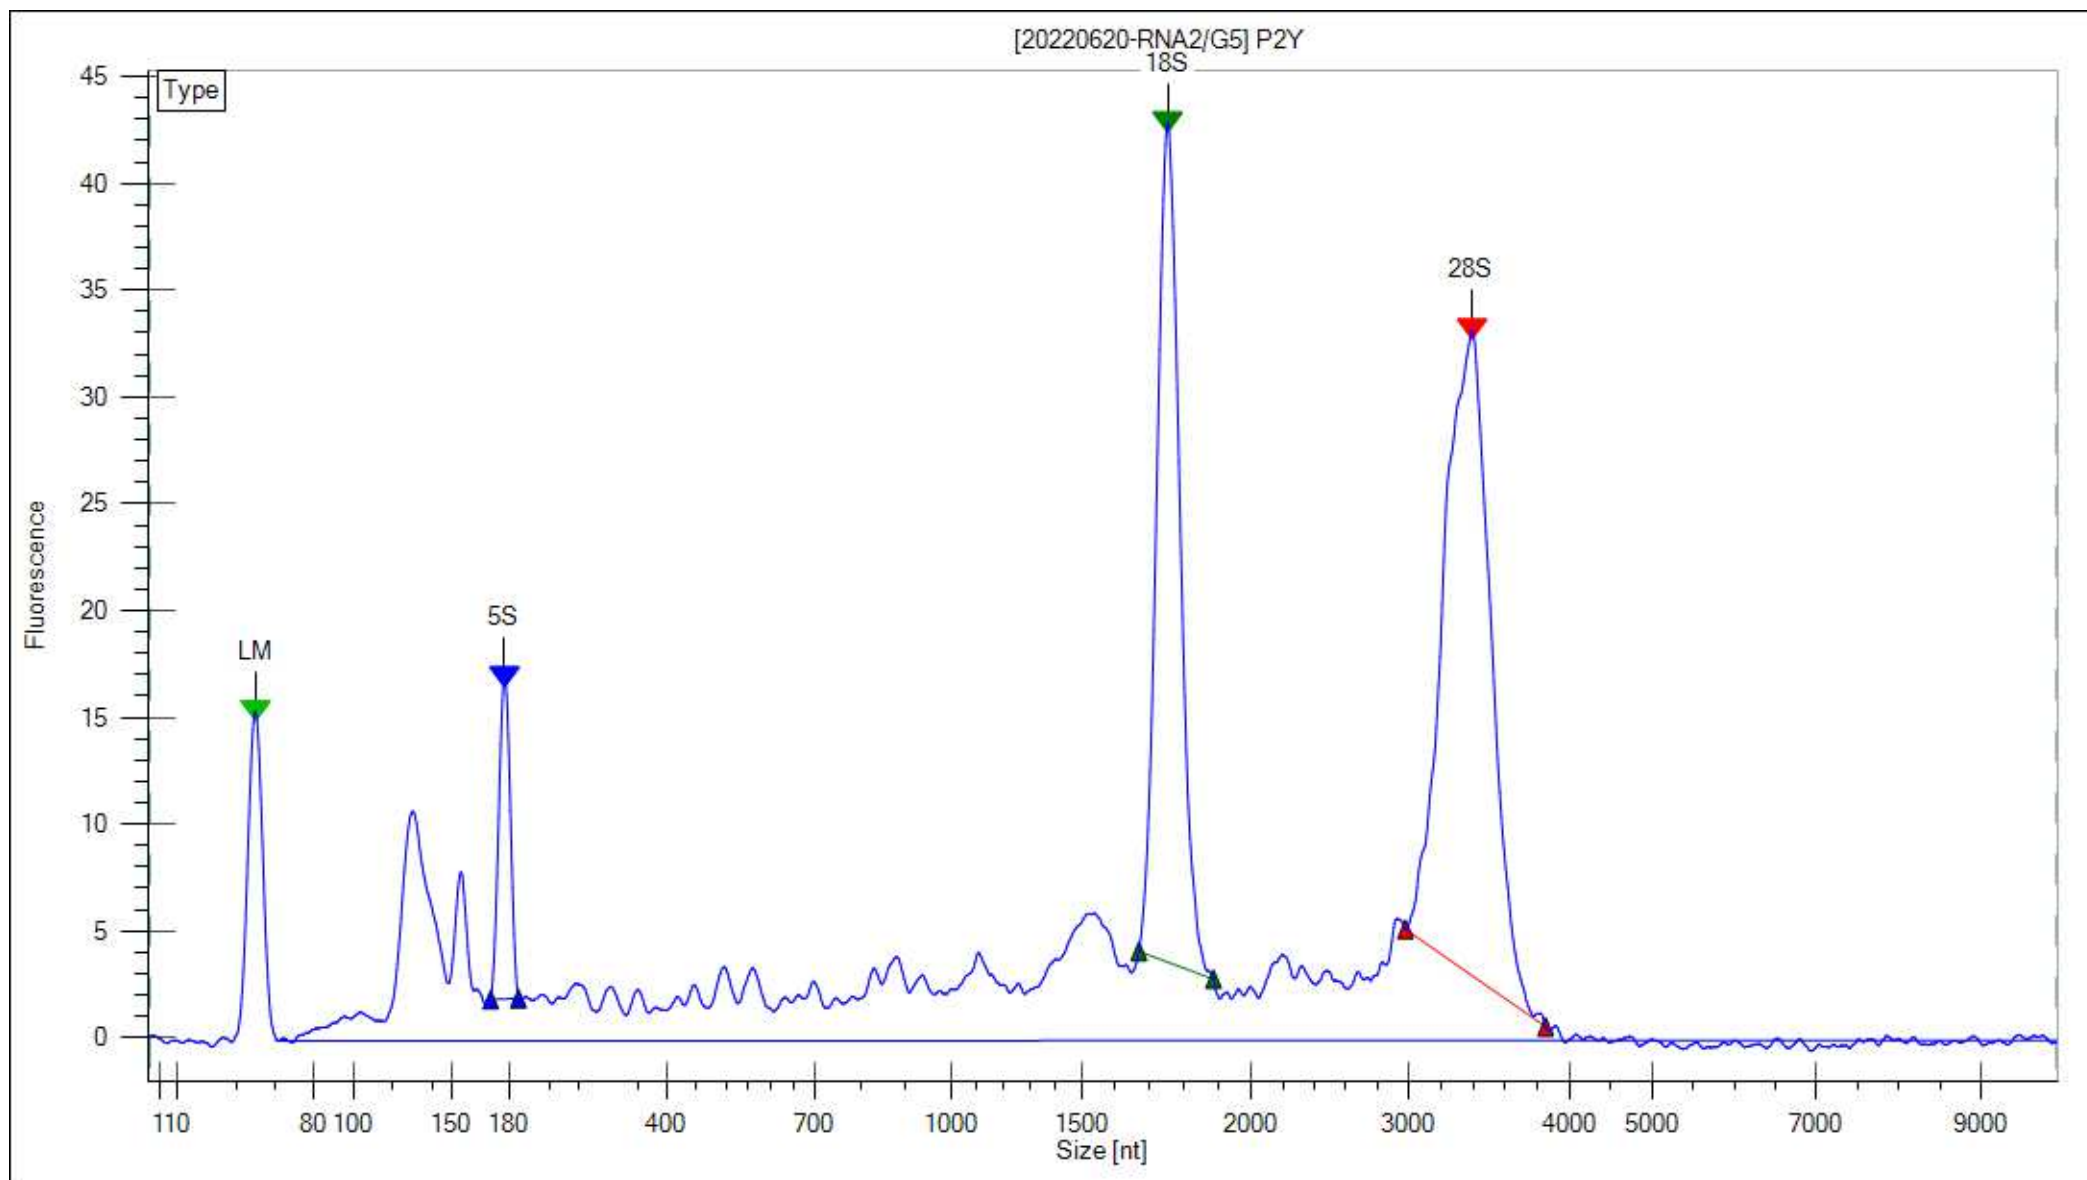

LabChip GX Software Version 5.4.2222.0

Copyright © 2017 PerkinElmer, Inc.

Datafile Created 2020/6/20 1:33:40 with S/W Version: 1.7.819.0

Analysis Version: 1

Chip Y521B-0564N-03 (Expiry: 2022/1/6)

20220620-RNA2.gxd

Modified: 2022/6/20 14:28:48 by DESKTOP-76N0R9H\deli

Printed: 2023/5/8 11:14:10

Firmware Version: 1.02.0.37277L\_45

Instrument: WINDOWS-H0697IN (S/N GT1810N0855)

Operator: qhzhang







| Plate Name    | Well Label | Sample Name | Peak Count | Total Conc. (ng/ul) | RNA Area | rRNA Area Ratio [28S/18S] | rRNA Height Ratio [28S/18S] | rRNA Fast Area Ratio | RNA Quality Score | 5S Area | 5S % Total | 18S Area | 18S % Total | 28S Area | 28S % Total |
|---------------|------------|-------------|------------|---------------------|----------|---------------------------|-----------------------------|----------------------|-------------------|---------|------------|----------|-------------|----------|-------------|
| 20220620-RNA2 | Ladder01   | Ladder1     |            | 83.30               | 290.09   |                           |                             |                      |                   |         |            |          |             |          |             |

| Well Label | Sample Name | Type | Size [nt] | Migration Time (sec) - Start | Migration Time (sec) - End | RNA Fragment | Fragment Area | % of Total Area | Fragment Start(sec) | Fragment End(sec) |
|------------|-------------|------|-----------|------------------------------|----------------------------|--------------|---------------|-----------------|---------------------|-------------------|
| Ladder01   | Ladder1     | LM   | 50        |                              |                            |              |               |                 |                     |                   |
| Ladder01   | Ladder1     | L    | 200       |                              |                            |              |               |                 |                     |                   |
| Ladder01   | Ladder1     | L    | 500       |                              |                            |              |               |                 |                     |                   |
| Ladder01   | Ladder1     | ?    | 609       |                              |                            |              |               |                 |                     |                   |
| Ladder01   | Ladder1     | ?    | 791       |                              |                            |              |               |                 |                     |                   |
| Ladder01   | Ladder1     | L    | 1000      |                              |                            |              |               |                 |                     |                   |
| Ladder01   | Ladder1     | ?    | 1307      |                              |                            |              |               |                 |                     |                   |
| Ladder01   | Ladder1     | L    | 1500      |                              |                            |              |               |                 |                     |                   |
| Ladder01   | Ladder1     | ?    | 1830      |                              |                            |              |               |                 |                     |                   |
| Ladder01   | Ladder1     | L    | 2000      |                              |                            |              |               |                 |                     |                   |
| Ladder01   | Ladder1     | ?    | 2452      |                              |                            |              |               |                 |                     |                   |
| Ladder01   | Ladder1     | ?    | 2793      |                              |                            |              |               |                 |                     |                   |
| Ladder01   | Ladder1     | L    | 3000      |                              |                            |              |               |                 |                     |                   |
| Ladder01   | Ladder1     | L    | 4000      |                              |                            |              |               |                 |                     |                   |
| Ladder01   | Ladder1     | ?    | 4712      |                              |                            |              |               |                 |                     |                   |
| Ladder01   | Ladder1     | L    | 6000      |                              |                            |              |               |                 |                     |                   |

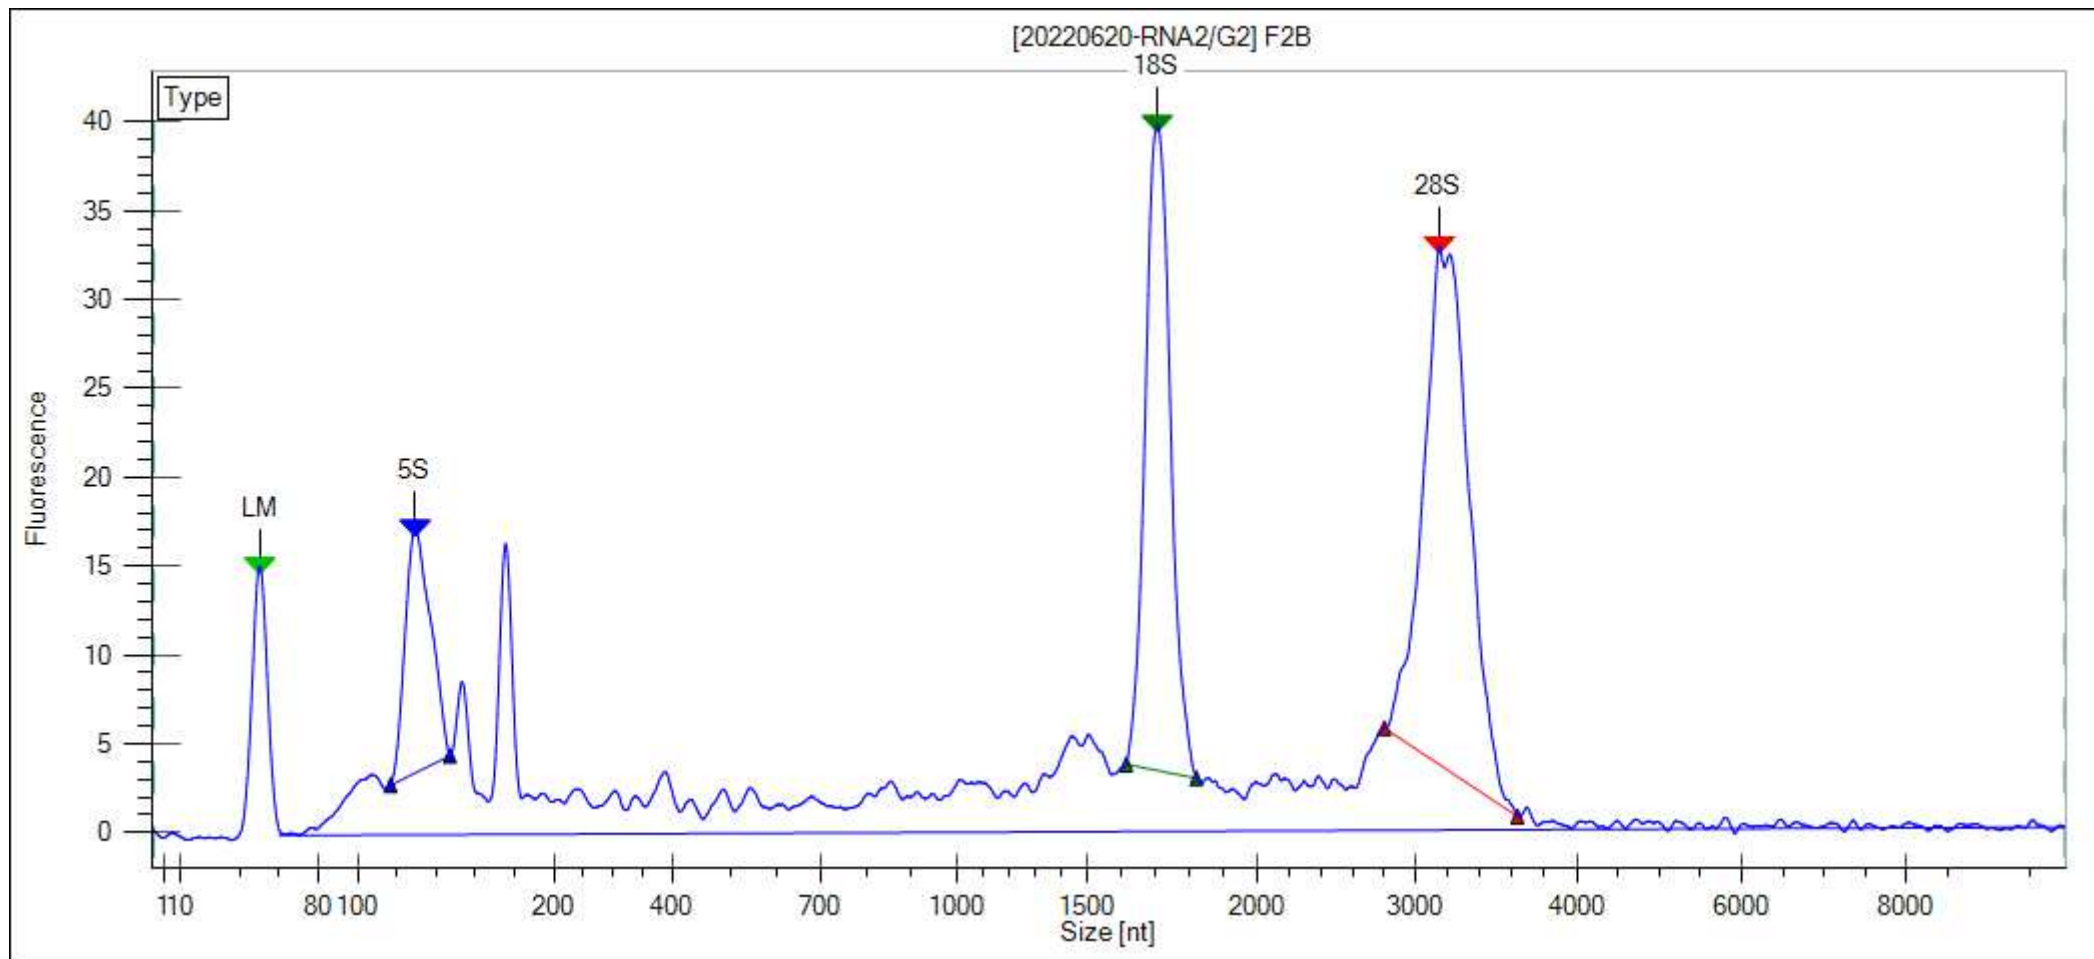

| Plate Name    | Well Label | Sample Name | Peak Count | Total Conc. (ng/ul) | RNA Area | rRNA Area Ratio [28S/18S] | rRNA Height Ratio [28S/18S] | rRNA Fast Area Ratio | RNA Quality Score | 5S Area | 5S % Total | 18S Area | 18S % Total | 28S Area | 28S % Total |
|---------------|------------|-------------|------------|---------------------|----------|---------------------------|-----------------------------|----------------------|-------------------|---------|------------|----------|-------------|----------|-------------|
| 20220620-RNA2 | G02        | F2B         | 16         | 58.14               | 204.89   | 1.47                      | 0.86                        | 0.28                 | 7.1               | 12.73   | 6.2%       | 33.18    | 16.2%       | 48.79    | 23.8%       |

| Well Label | Sample Name | Type | Size [nt] | Migration Time (sec) - Start | Migration Time (sec) - End | RNA Fragment | Fragment Area | % of Total Area | Fragment Start(sec) | Fragment End(sec) |
|------------|-------------|------|-----------|------------------------------|----------------------------|--------------|---------------|-----------------|---------------------|-------------------|
| G02        | F2B         | LM   | 50        |                              |                            |              |               |                 |                     |                   |
| G02        | F2B         |      | 107       |                              |                            |              |               |                 |                     |                   |
| G02        | F2B         | 5S   | 129       |                              |                            | 5S           | 12.73         | 6.2%            | 29.43               | 31.28             |
| G02        | F2B         |      | 153       |                              |                            |              |               |                 |                     |                   |
| G02        | F2B         |      | 175       |                              |                            |              |               |                 |                     |                   |
| G02        | F2B         |      | 304       |                              |                            |              |               |                 |                     |                   |
| G02        | F2B         |      | 387       |                              |                            |              |               |                 |                     |                   |
| G02        | F2B         |      | 487       |                              |                            |              |               |                 |                     |                   |
| G02        | F2B         |      | 542       |                              |                            |              |               |                 |                     |                   |
| G02        | F2B         |      | 854       |                              |                            |              |               |                 |                     |                   |
| G02        | F2B         |      | 1010      |                              |                            |              |               |                 |                     |                   |
| G02        | F2B         |      | 1443      |                              |                            |              |               |                 |                     |                   |
| G02        | F2B         | 18S  | 1706      |                              |                            | 18S          | 33.18         | 16.2%           | 52.38               | 54.57             |
| G02        | F2B         |      | 2103      |                              |                            |              |               |                 |                     |                   |
| G02        | F2B         |      | 2801      |                              |                            |              |               |                 |                     |                   |
| G02        | F2B         | 28S  | 3151      |                              |                            | 28S          | 48.79         | 23.8%           | 60.43               | 64.58             |
| G02        | F2B         |      | 3694      |                              |                            |              |               |                 |                     |                   |

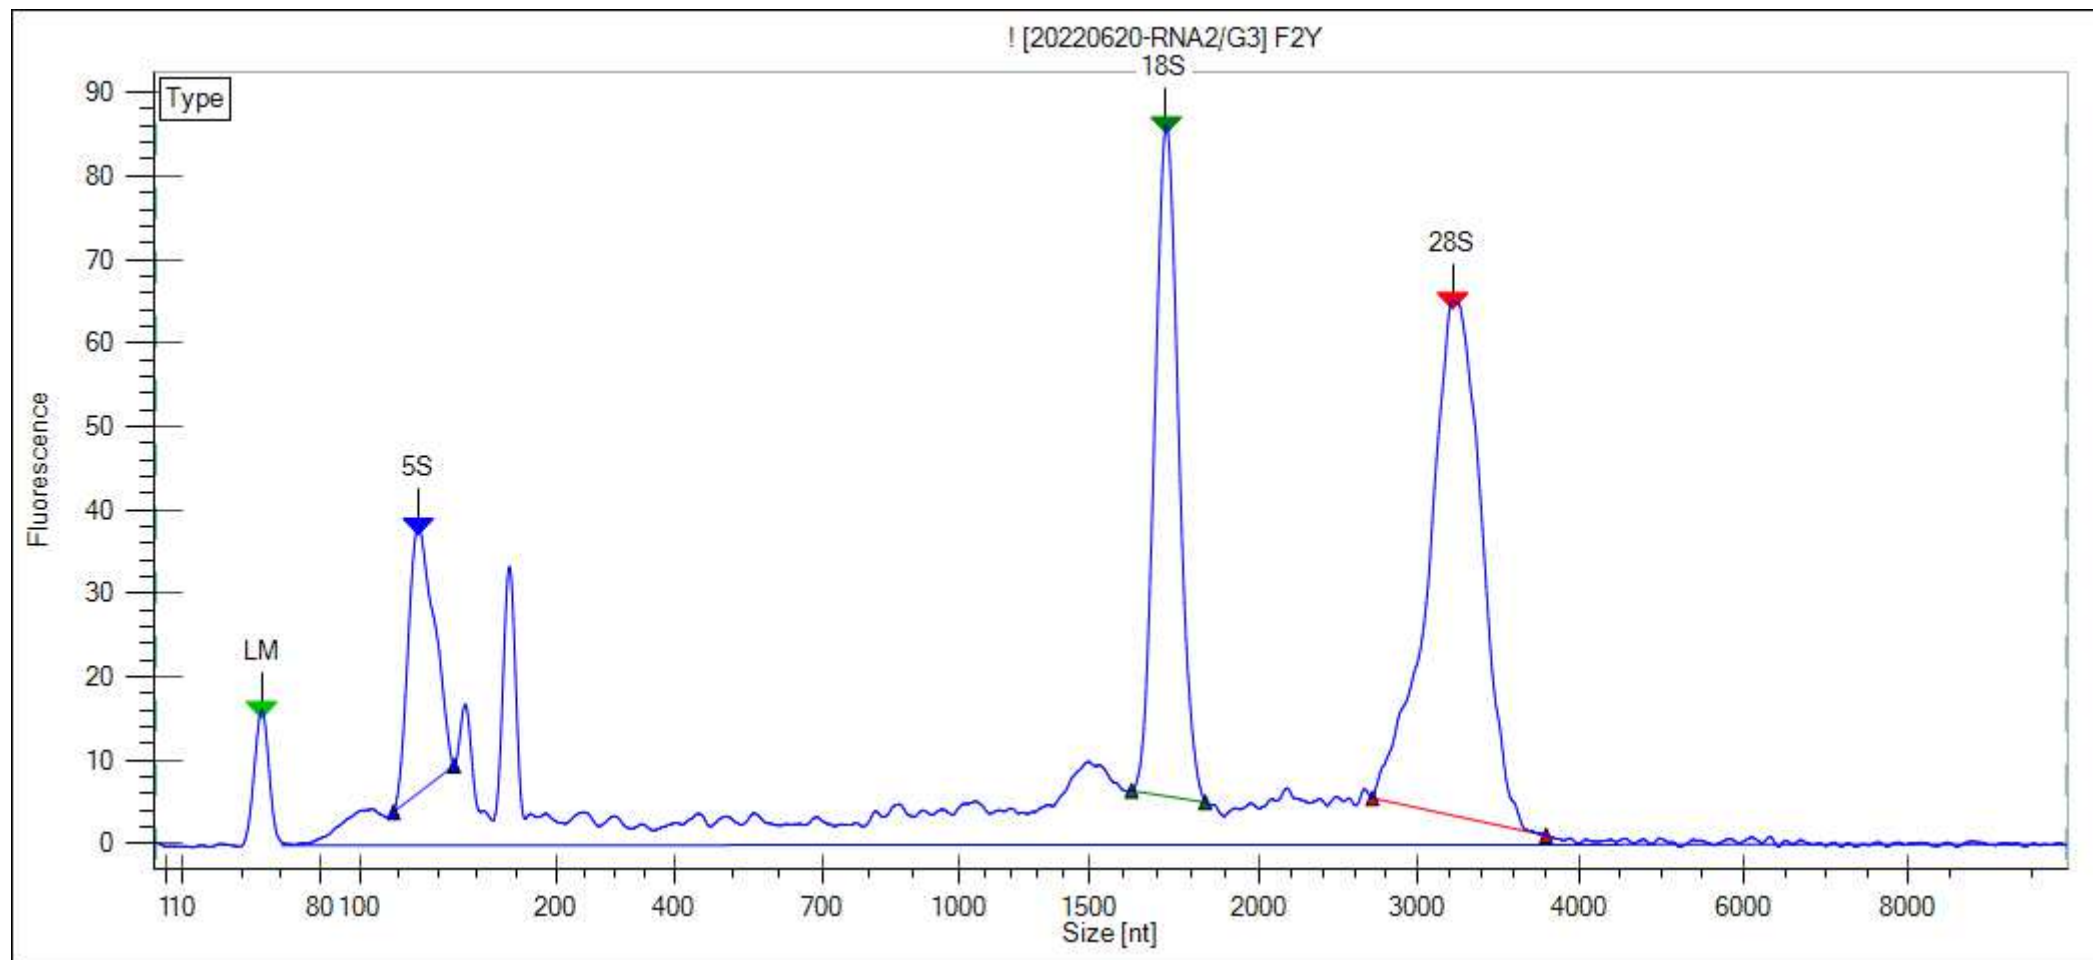

| Plate Name    | Well Label | Sample Name | Peak Count | Total Conc. (ng/ul) | RNA Area | rRNA Area Ratio [28S/18S] | rRNA Height Ratio [28S/18S] | rRNA Fast Area Ratio | RNA Quality Score | 5S Area | 5S % Total | 18S Area | 18S % Total | 28S Area | 28S % Total |
|---------------|------------|-------------|------------|---------------------|----------|---------------------------|-----------------------------|----------------------|-------------------|---------|------------|----------|-------------|----------|-------------|
| 20220620-RNA2 | G03        | F2Y         | 22         | 113.05              | 400.39   | 1.71                      | 0.77                        | 0.25                 | [7.5]             | 30.04   | 7.5%       | 69.63    | 17.4%       | 119.16   | 29.8%       |

| Well Label | Sample Name | Type | Size [nt] | Migration Time (sec) - Start | Migration Time (sec) - End | RNA Fragment | Fragment Area | % of Total Area | Fragment Start(sec) | Fragment End(sec) |
|------------|-------------|------|-----------|------------------------------|----------------------------|--------------|---------------|-----------------|---------------------|-------------------|
| G03        | F2Y         | LM   | 50        |                              |                            |              |               |                 |                     |                   |
| G03        | F2Y         |      | 100       |                              |                            |              |               |                 |                     |                   |
| G03        | F2Y         | 5S   | 130       |                              |                            | 5S           | 30.04         | 7.5%            | 29.47               | 31.35             |
| G03        | F2Y         |      | 154       |                              |                            |              |               |                 |                     |                   |
| G03        | F2Y         |      | 176       |                              |                            |              |               |                 |                     |                   |
| G03        | F2Y         |      | 246       |                              |                            |              |               |                 |                     |                   |
| G03        | F2Y         |      | 298       |                              |                            |              |               |                 |                     |                   |
| G03        | F2Y         |      | 442       |                              |                            |              |               |                 |                     |                   |
| G03        | F2Y         |      | 489       |                              |                            |              |               |                 |                     |                   |
| G03        | F2Y         |      | 546       |                              |                            |              |               |                 |                     |                   |
| G03        | F2Y         |      | 685       |                              |                            |              |               |                 |                     |                   |
| G03        | F2Y         |      | 815       |                              |                            |              |               |                 |                     |                   |
| G03        | F2Y         |      | 868       |                              |                            |              |               |                 |                     |                   |
| G03        | F2Y         |      | 1065      |                              |                            |              |               |                 |                     |                   |
| G03        | F2Y         |      | 1499      |                              |                            |              |               |                 |                     |                   |
| G03        | F2Y         | 18S  | 1725      |                              |                            | 18S          | 69.63         | 17.4%           | 52.48               | 54.78             |
| G03        | F2Y         |      | 2168      |                              |                            |              |               |                 |                     |                   |
| G03        | F2Y         |      | 2485      |                              |                            |              |               |                 |                     |                   |
| G03        | F2Y         |      | 2564      |                              |                            |              |               |                 |                     |                   |
| G03        | F2Y         |      | 2664      |                              |                            |              |               |                 |                     |                   |
| G03        | F2Y         | 28S  | 3222      |                              |                            | 28S          | 119.16        | 29.8%           | 60.00               | 65.42             |
| G03        | F2Y         |      | 6098      |                              |                            |              |               |                 |                     |                   |
| G03        | F2Y         |      | 6327      |                              |                            |              |               |                 |                     |                   |

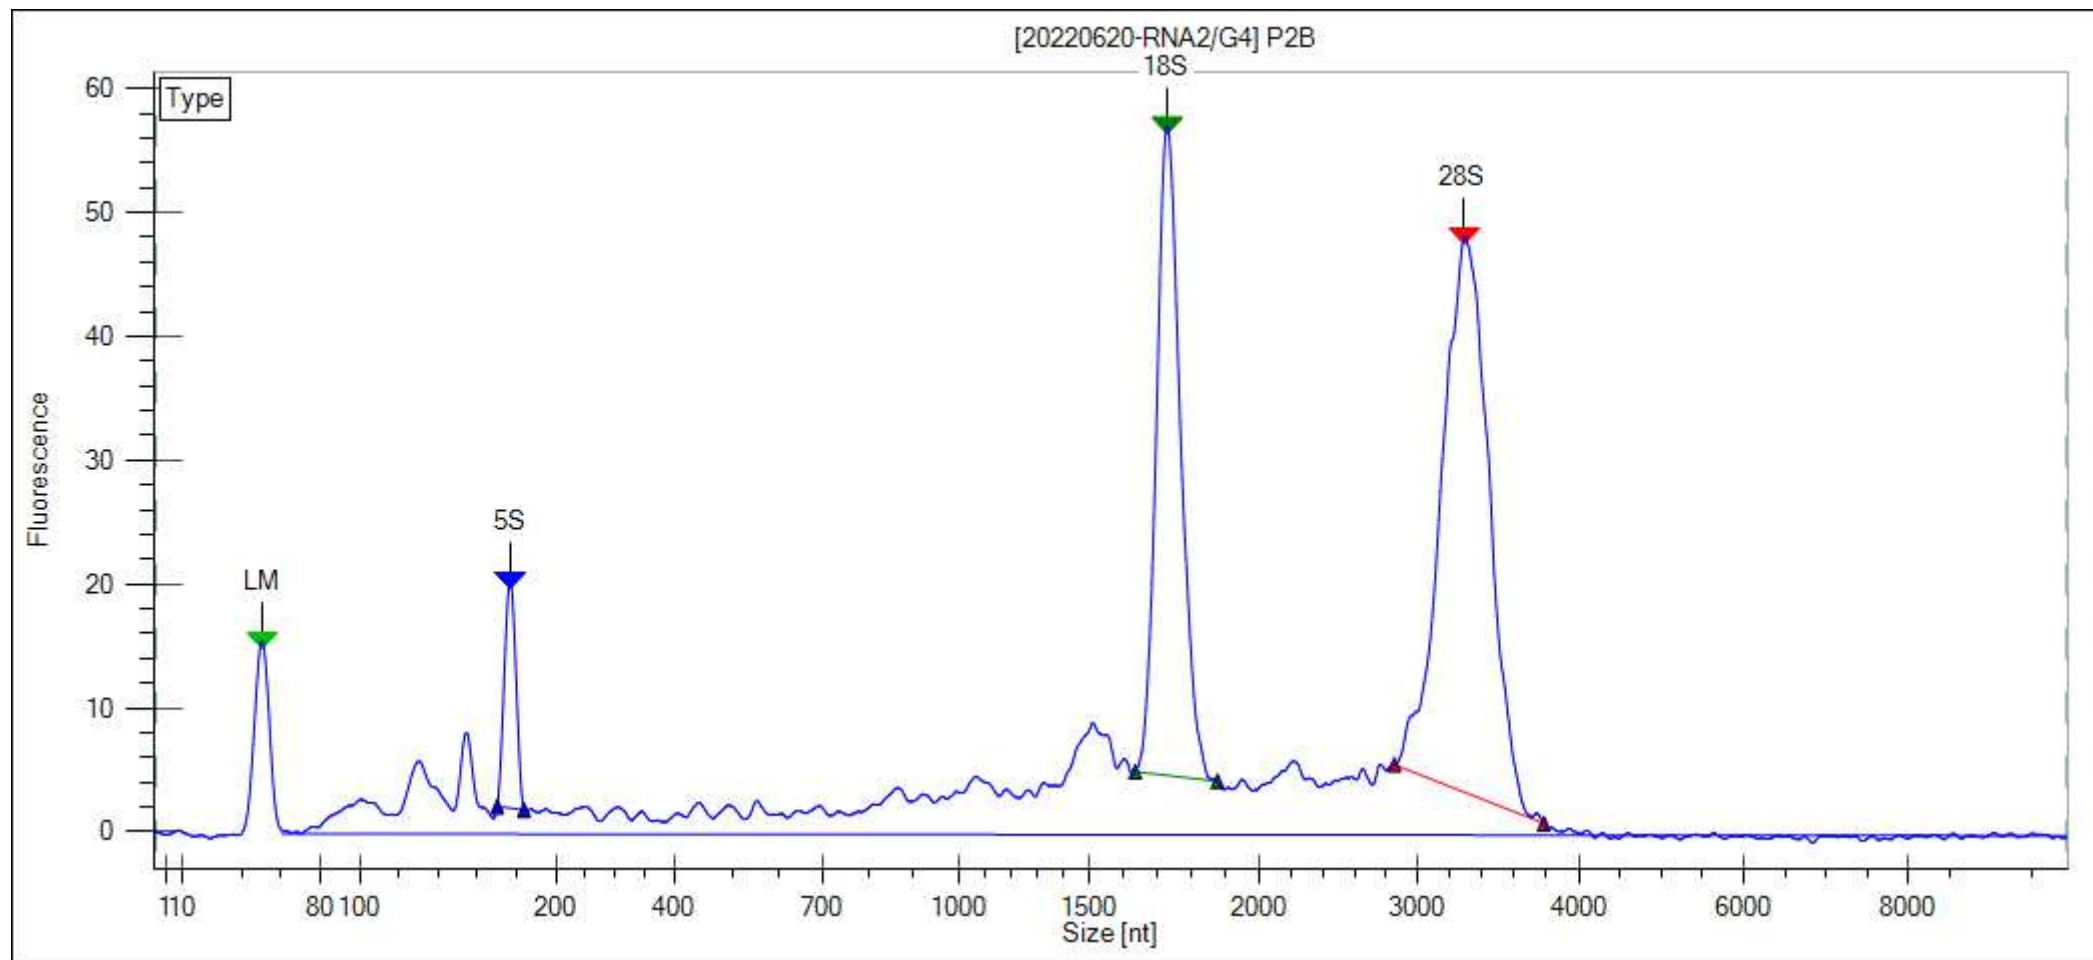

| Plate Name    | Well Label | Sample Name | Peak Count | Total Conc. (ng/ul) | RNA Area | rRNA Area Ratio [28S/18S] | rRNA Height Ratio [28S/18S] | rRNA Fast Area Ratio | RNA Quality Score | 5S Area | 5S % Total | 18S Area | 18S % Total | 28S Area | 28S % Total |
|---------------|------------|-------------|------------|---------------------|----------|---------------------------|-----------------------------|----------------------|-------------------|---------|------------|----------|-------------|----------|-------------|
| 20220620-RNA2 | G04        | P2B         | 17         | 73.82               | 254.58   | 1.69                      | 0.86                        | 0.21                 | 7.8               | 7.68    | 3.0%       | 45.79    | 18.0%       | 77.26    | 30.3%       |

| Well Label | Sample Name | Type | Size [nt] | Migration Time (sec) - Start | Migration Time (sec) - End | RNA Fragment | Fragment Area | % of Total Area | Fragment Start(sec) | Fragment End(sec) |
|------------|-------------|------|-----------|------------------------------|----------------------------|--------------|---------------|-----------------|---------------------|-------------------|
| G04        | P2B         | LM   | 50        |                              |                            |              |               |                 |                     |                   |
| G04        | P2B         |      | 100       |                              |                            |              |               |                 |                     |                   |
| G04        | P2B         |      | 130       |                              |                            |              |               |                 |                     |                   |
| G04        | P2B         |      | 154       |                              |                            |              |               |                 |                     |                   |
| G04        | P2B         |      | 177       |                              |                            |              |               |                 |                     |                   |
| G04        | P2B         | 5S   | 307       |                              |                            | 5S           | 7.68          | 3.0%            | 32.70               | 33.53             |
| G04        | P2B         |      | 444       |                              |                            |              |               |                 |                     |                   |
| G04        | P2B         |      | 494       |                              |                            |              |               |                 |                     |                   |
| G04        | P2B         |      | 552       |                              |                            |              |               |                 |                     |                   |
| G04        | P2B         |      | 863       |                              |                            |              |               |                 |                     |                   |
| G04        | P2B         |      | 1066      |                              |                            |              |               |                 |                     |                   |
| G04        | P2B         |      | 1510      |                              |                            |              |               |                 |                     |                   |
| G04        | P2B         |      | 1602      |                              |                            |              |               |                 |                     |                   |
| G04        | P2B         |      | 1728      |                              |                            | 18S          | 45.79         | 18.0%           | 52.60               | 55.17             |
| G04        | P2B         |      | 2213      |                              |                            |              |               |                 |                     |                   |
| G04        | P2B         | 18S  | 2651      |                              |                            |              |               |                 |                     |                   |
| G04        | P2B         |      | 2762      |                              |                            |              |               |                 |                     |                   |
| G04        | P2B         |      | 3293      |                              |                            | 28S          | 77.26         | 30.3%           | 60.68               | 65.35             |



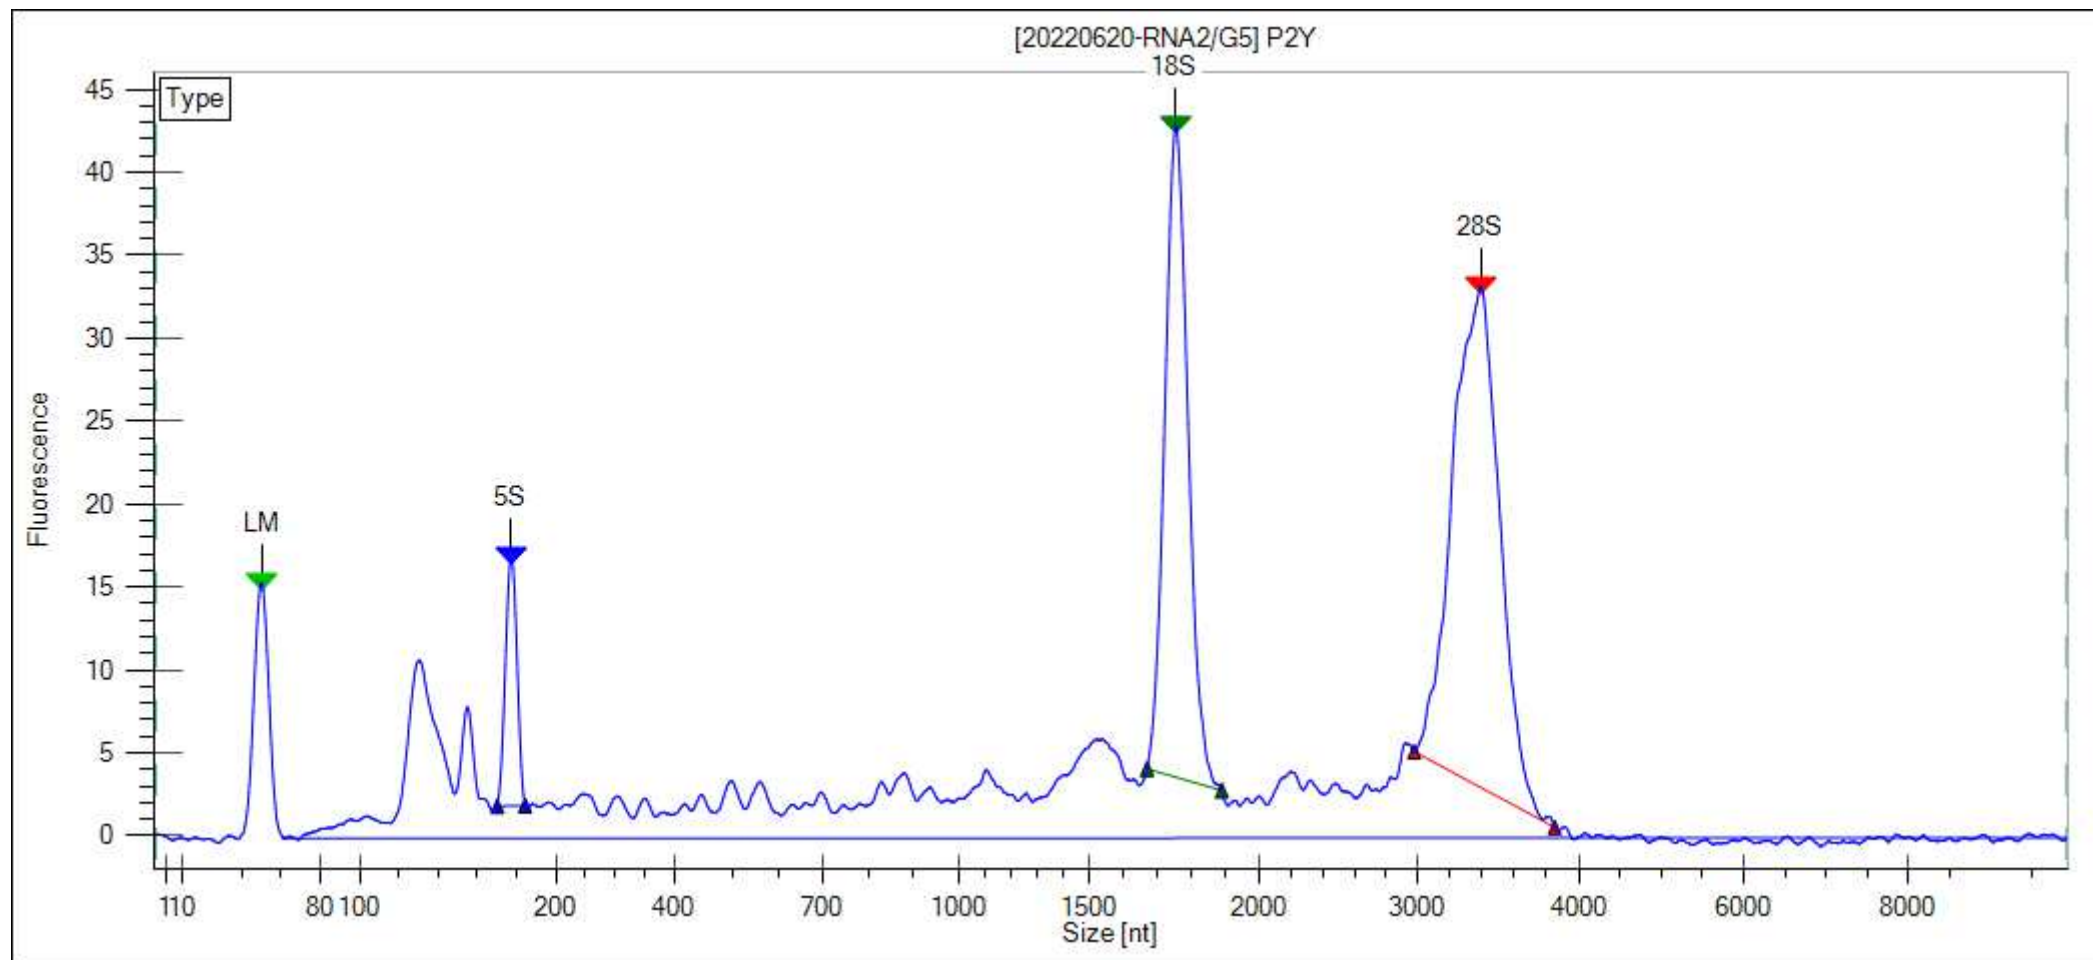

| Plate Name    | Well Label | Sample Name | Peak Count | Total Conc. (ng/ul) | RNA Area | rRNA Area Ratio [28S/18S] | rRNA Height Ratio [28S/18S] | rRNA Fast Area Ratio | RNA Quality Score | 5S Area | 5S % Total | 18S Area | 18S % Total | 28S Area | 28S % Total |
|---------------|------------|-------------|------------|---------------------|----------|---------------------------|-----------------------------|----------------------|-------------------|---------|------------|----------|-------------|----------|-------------|
| 20220620-RNA2 | G05        | P2Y         | 19         | 59.05               | 200.77   | 1.55                      | 0.80                        | 0.25                 | 7.2               | 6.29    | 3.1%       | 33.08    | 16.5%       | 51.37    | 25.6%       |

| Well Label | Sample Name | Type | Size [nt] | Migration Time (sec) - Start | Migration Time (sec) - End | RNA Fragment | Fragment Area | % of Total Area | Fragment Start(sec) | Fragment End(sec) |
|------------|-------------|------|-----------|------------------------------|----------------------------|--------------|---------------|-----------------|---------------------|-------------------|
| G05        | P2Y         | LM   | 50        |                              |                            |              |               |                 |                     |                   |
| G05        | P2Y         |      | 130       |                              |                            |              |               |                 |                     |                   |
| G05        | P2Y         |      | 155       |                              |                            |              |               |                 |                     |                   |
| G05        | P2Y         | 5S   | 177       |                              |                            | 5S           | 6.29          | 3.1%            | 32.70               | 33.57             |
| G05        | P2Y         |      | 247       |                              |                            |              |               |                 |                     |                   |
| G05        | P2Y         |      | 303       |                              |                            |              |               |                 |                     |                   |
| G05        | P2Y         |      | 351       |                              |                            |              |               |                 |                     |                   |
| G05        | P2Y         |      | 446       |                              |                            |              |               |                 |                     |                   |
| G05        | P2Y         |      | 498       |                              |                            |              |               |                 |                     |                   |
| G05        | P2Y         |      | 560       |                              |                            |              |               |                 |                     |                   |
| G05        | P2Y         |      | 694       |                              |                            |              |               |                 |                     |                   |
| G05        | P2Y         |      | 829       |                              |                            |              |               |                 |                     |                   |
| G05        | P2Y         |      | 880       |                              |                            |              |               |                 |                     |                   |
| G05        | P2Y         |      | 1106      |                              |                            |              |               |                 |                     |                   |
| G05        | P2Y         |      | 1522      |                              |                            |              |               |                 |                     |                   |
| G05        | P2Y         | 18S  | 1753      |                              |                            | 18S          | 33.08         | 16.5%           | 52.97               | 55.30             |
| G05        | P2Y         |      | 2192      |                              |                            |              |               |                 |                     |                   |
| G05        | P2Y         |      | 2317      |                              |                            |              |               |                 |                     |                   |
| G05        | P2Y         |      | 2929      |                              |                            |              |               |                 |                     |                   |
| G05        | P2Y         | 28S  | 3394      |                              |                            | 28S          | 51.37         | 25.6%           | 61.30               | 65.68             |
| G05        | P2Y         | ?    |           |                              |                            |              |               |                 |                     |                   |
